# Supplementary material for: Exploring Immune-Related Prognostic Signatures in the Tumor Microenvironment of Colon Cancer
Source: Front Genet. 2022 Feb 24;13:801484. doi: 10.3389/fgene.2022.801484 (PMC8907673; doi:10.3389/fgene.2022.801484)
Supplement: Supplementary file 9 [file Table4.XLSX]

## Sheet: Sheet1
Table S4. Detailed information of Immunotherapeutic cohort
	without platinum treatment			with platinum treatment
	Alive	Death	Overall	Alive	Death	Overall
	(N=91)	(N=146)	(N=237)	(N=23)	(N=82)	(N=105)
Gender
F	18 (19.8%)	33 (22.6%)	51 (21.5%)	3 (13.0%)	20 (24.4%)	23 (21.9%)
M	73 (80.2%)	113 (77.4%)	186 (78.5%)	20 (87.0%)	62 (75.6%)	82 (78.1%)
Immunotherapeutic response
CR	18 (19.8%)	0 (0%)	18 (7.6%)	5 (21.7%)	1 (1.2%)	6 (5.7%)
PR	32 (35.2%)	0 (0%)	32 (13.5%)	7 (30.4%)	3 (3.7%)	10 (9.5%)
SD	17 (18.7%)	23 (15.8%)	40 (16.9%)	6 (26.1%)	16 (19.5%)	22 (21.0%)
PD	17 (18.7%)	90 (61.6%)	107 (45.1%)	5 (21.7%)	52 (63.4%)	57 (54.3%)
NE	7 (7.7%)	33 (22.6%)	40 (16.9%)	0 (0%)	10 (12.2%)	10 (9.5%)
IC Level
IC0	19 (20.9%)	37 (25.3%)	56 (23.6%)	6 (26.1%)	34 (41.5%)	40 (38.1%)
IC1	36 (39.6%)	66 (45.2%)	102 (43.0%)	3 (13.0%)	26 (31.7%)	29 (27.6%)
IC2+	35 (38.5%)	43 (29.5%)	78 (32.9%)	14 (60.9%)	22 (26.8%)	36 (34.3%)
Missing	1 (1.1%)	0 (0%)	1 (0.4%)
TC Level
TC0	73 (80.2%)	108 (74.0%)	181 (76.4%)	19 (82.6%)	70 (85.4%)	89 (84.8%)
TC1	5 (5.5%)	13 (8.9%)	18 (7.6%)	1 (4.3%)	2 (2.4%)	3 (2.9%)
TC2+	12 (13.2%)	25 (17.1%)	37 (15.6%)	3 (13.0%)	10 (12.2%)	13 (12.4%)
Missing	1 (1.1%)	0 (0%)	1 (0.4%)
CR, complete response; PR, paritcial response; SD, stable disease; PD, progressive disease.
