# Supplementary material for: Exploring Immune-Related Prognostic Signatures in the Tumor Microenvironment of Colon Cancer
Source: Front Genet. 2022 Feb 24;13:801484. doi: 10.3389/fgene.2022.801484 (PMC8907673; doi:10.3389/fgene.2022.801484)
Supplement: Supplementary file 12 [file Table5.XLSX]

## Sheet: Sheet1
Table S5. Detailed information of the training dataset, test dataset and the whole dataset from TCGA-COAD cohort.
	Overall samples			Training samples			Test samples
	Alive	Death	Overall	Alive	Death	Overall	Alive	Death	Overall
	(N=338)	(N=94)	(N=432)	(N=168)	(N=48)	(N=216)	(N=170)	(N=46)	(N=216)
Gender
female	158 (46.7%)	42 (44.7%)	200 (46.3%)	81 (48.2%)	20 (41.7%)	101 (46.8%)	77 (45.3%)	22 (47.8%)	99 (45.8%)
male	180 (53.3%)	52 (55.3%)	232 (53.7%)	87 (51.8%)	28 (58.3%)	115 (53.2%)	93 (54.7%)	24 (52.2%)	117 (54.2%)
Age
<=60	112 (33.1%)	24 (25.5%)	136 (31.5%)	59 (35.1%)	11 (22.9%)	70 (32.4%)	53 (31.2%)	13 (28.3%)	66 (30.6%)
>60	226 (66.9%)	70 (74.5%)	296 (68.5%)	109 (64.9%)	37 (77.1%)	146 (67.6%)	117 (68.8%)	33 (71.7%)	150 (69.4%)
Microsatellite status
MSI-H	56 (16.6%)	16 (17.0%)	72 (16.7%)	31 (18.5%)	11 (22.9%)	42 (19.4%)	25 (14.7%)	5 (10.9%)	30 (13.9%)
MSI-L	53 (15.7%)	19 (20.2%)	72 (16.7%)	24 (14.3%)	10 (20.8%)	34 (15.7%)	29 (17.1%)	9 (19.6%)	38 (17.6%)
MSS	218 (64.5%)	59 (62.8%)	277 (64.1%)	110 (65.5%)	27 (56.2%)	137 (63.4%)	108 (63.5%)	32 (69.6%)	140 (64.8%)
missing	11(3.3%)	0 (0%)	11(2.6%)	3(1.8%)	0 (0%)	3(1.4%)	8(4.7%)	0 (0%)	8(3.7%)
AJCC-stage
i	69 (20.4%)	4 (4.3%)	73 (16.9%)	37 (22.0%)	2 (4.2%)	39 (18.1%)	32 (18.8%)	2 (4.3%)	34 (15.7%)
ii	140 (41.4%)	26 (27.7%)	166 (38.4%)	71 (42.3%)	15 (31.2%)	86 (39.8%)	69 (40.6%)	11 (23.9%)	80 (37.0%)
iii	93 (27.5%)	29 (30.9%)	122 (28.2%)	43 (25.6%)	13 (27.1%)	56 (25.9%)	50 (29.4%)	16 (34.8%)	66 (30.6%)
iv	30 (8.9%)	30 (31.9%)	60 (13.9%)	14 (8.3%)	15 (31.2%)	29 (13.4%)	16 (9.4%)	15 (32.6%)	31 (14.4%)
Missing	6 (1.8%)	5 (5.3%)	11 (2.5%)	3 (1.8%)	3 (6.2%)	6 (2.8%)	3 (1.8%)	2 (4.3%)	5 (2.3%)
AJCC-T
T1	9 (2.7%)	2 (2.1%)	11 (2.5%)	5 (3.0%)	1 (2.1%)	6 (2.8%)	4 (2.4%)	1 (2.2%)	5 (2.3%)
T2	71 (21.0%)	4 (4.3%)	75 (17.4%)	39 (23.2%)	2 (4.2%)	41 (19.0%)	32 (18.8%)	2 (4.3%)	34 (15.7%)
T3	229 (67.8%)	67 (71.3%)	296 (68.5%)	113 (67.3%)	31 (64.6%)	144 (66.7%)	116 (68.2%)	36 (78.3%)	152 (70.4%)
T4	28 (8.3%)	21 (22.3%)	49 (11.3%)	10 (6.0%)	14 (29.2%)	24 (11.1%)	18 (10.6%)	7 (15.2%)	25 (11.6%)
Missing	1 (0.3%)	0 (0%)	1 (0.2%)	1 (0.6%)	0 (0%)	1 (0.5%)
AJCC-N
N0	219 (64.8%)	35 (37.2%)	254 (58.8%)	114 (67.9%)	18 (37.5%)	132 (61.1%)	105 (61.8%)	17 (37.0%)	122 (56.5%)
N1	76 (22.5%)	24 (25.5%)	100 (23.1%)	37 (22.0%)	12 (25.0%)	49 (22.7%)	39 (22.9%)	12 (26.1%)	51 (23.6%)
N2	43 (12.7%)	35 (37.2%)	78 (18.1%)	17 (10.1%)	18 (37.5%)	35 (16.2%)	26 (15.3%)	17 (37.0%)	43 (19.9%)
AJCC-M
M0	269 (79.6%)	49 (52.1%)	318 (73.6%)	134 (79.8%)	25 (52.1%)	159 (73.6%)	135 (79.4%)	24 (52.2%)	159 (73.6%)
M1	30 (8.9%)	30 (31.9%)	60 (13.9%)	14 (8.3%)	15 (31.2%)	29 (13.4%)	16 (9.4%)	15 (32.6%)	31 (14.4%)
MX	35 (10.4%)	12 (12.8%)	47 (10.9%)	18 (10.7%)	7 (14.6%)	25 (11.6%)	17 (10.0%)	5 (10.9%)	22 (10.2%)
Missing	4 (1.2%)	3 (3.2%)	7 (1.6%)	2 (1.2%)	1 (2.1%)	3 (1.4%)	2 (1.2%)	2 (4.3%)	4 (1.9%)
AJCC, American Joint Committee on Cancer.
